# Supplementary material for: A robust clustering strategy for stratification unveils unique patient subgroups in acutely decompensated cirrhosis
Source: PubMed Central journal article supplement (PMC11210156; doi:10.1186/s12967-024-05386-2), 2024-06-27
Supplement: 12967_2024_5386_MOESM2_ESM.pdf [file 12967_2024_5386_MOESM2_ESM.pdf]

# ClustALL – NA's

## 1. Data Complexity Reduction

### A. Original Dataset

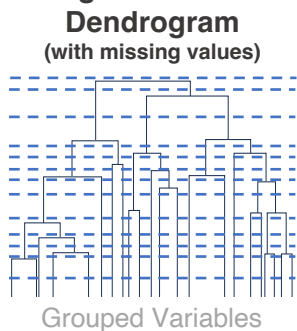

### C.

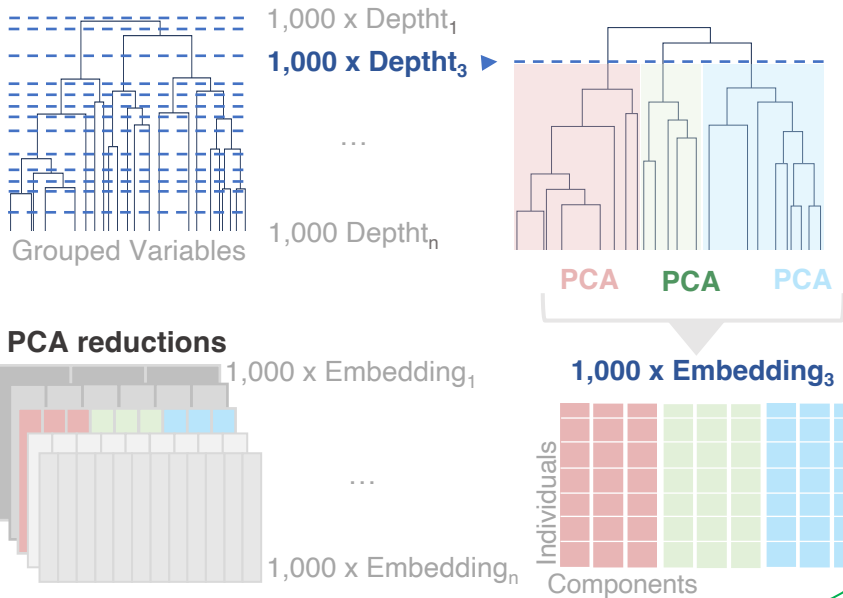

### B. 1,000x Imputation

1,000 complete Datasets

## 2. Stratification Process

### A. For each embedding:

Distance metric + Clustering

### B. Evaluation of the optimal number of clusters

- Internal validation measurements
- Consensus across the imputed datasets for each *Depth*

**Stratifications**

Imputation + Embedding + Distance + Clustering

### C.

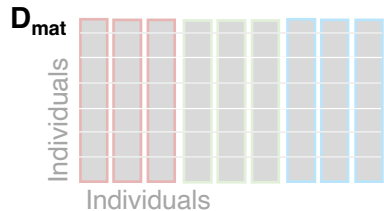

**Correlation Distance**  
**+ H-cluster Clustering**  
**+ Optimal cluster number**

**Final Stratifications**

Embedding + Distance + Clustering

## 3. Consensus-based Stratifications
