# Supplementary material for: A robust clustering strategy for stratification unveils unique patient subgroups in acutely decompensated cirrhosis
Source: PubMed Central journal article supplement (PMC11210156; doi:10.1186/s12967-024-05386-2), 2024-06-27

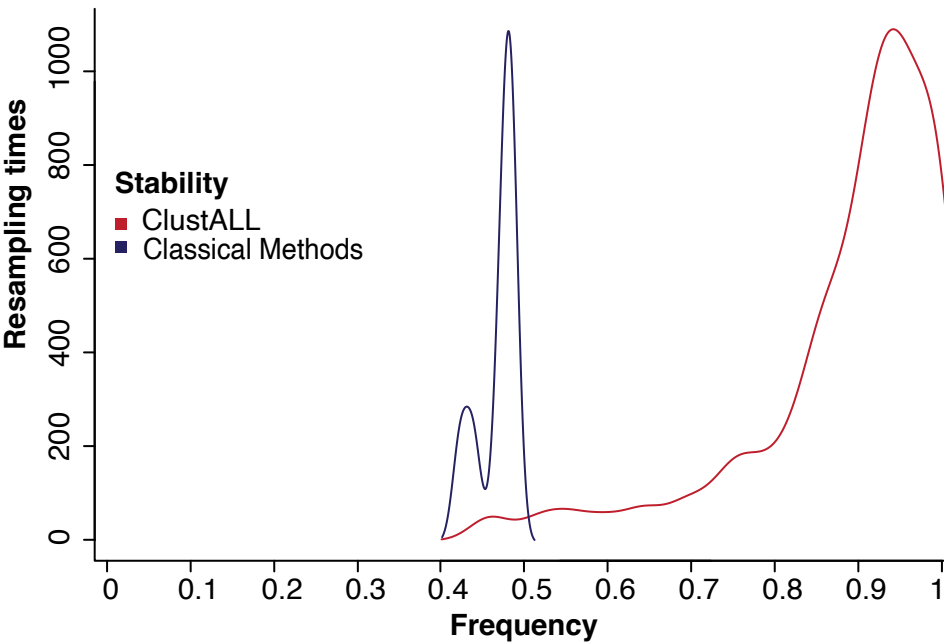

Supplement: 12967_2024_5386_MOESM4_ESM.pdf [file 12967_2024_5386_MOESM4_ESM.pdf]
